# Supplementary material for: Comparison of Cox Model Methods in A Low-dimensional Setting with Few Events
Source: PubMed Central journal article supplement (PMC4996851; doi:10.1016/j.gpb.2016.03.006), 2016-05-17

**A**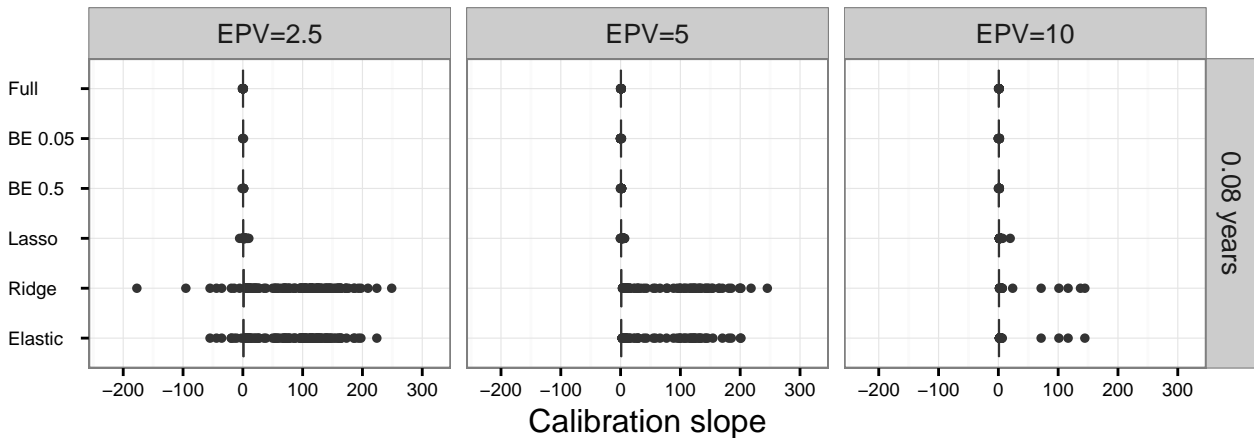**B**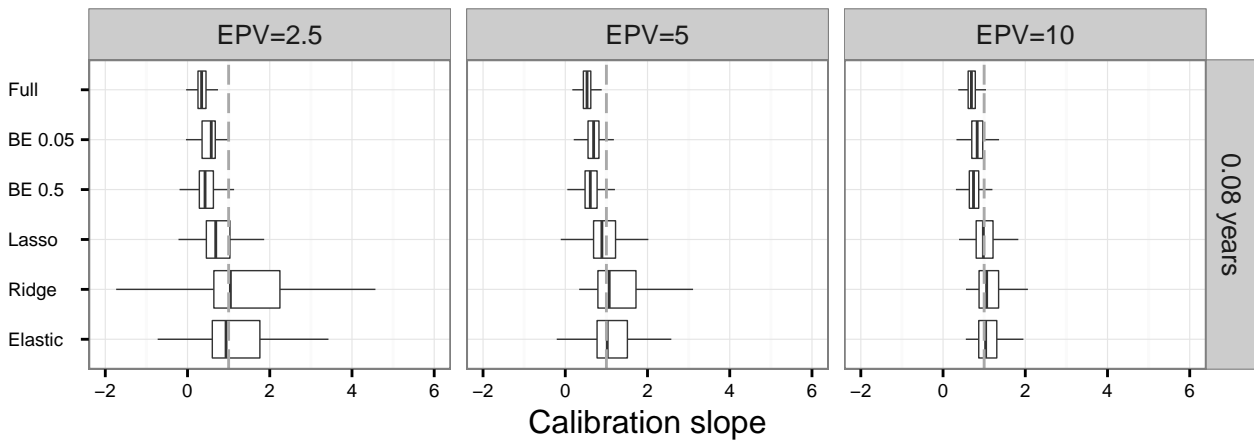

Supplement: mmc3.pdf [file mmc3.pdf]
